# Supplementary material for: The NLRP3 Inflammasome Is Dispensable in Methicillin-Resistant Staphylococcus aureus Urinary Tract Infection
Source: MDPI journal article supplement (doi:10.3390/pathogens13020106), 2024-01-25

Fig. S1. The gating strategy for flow cytometry.

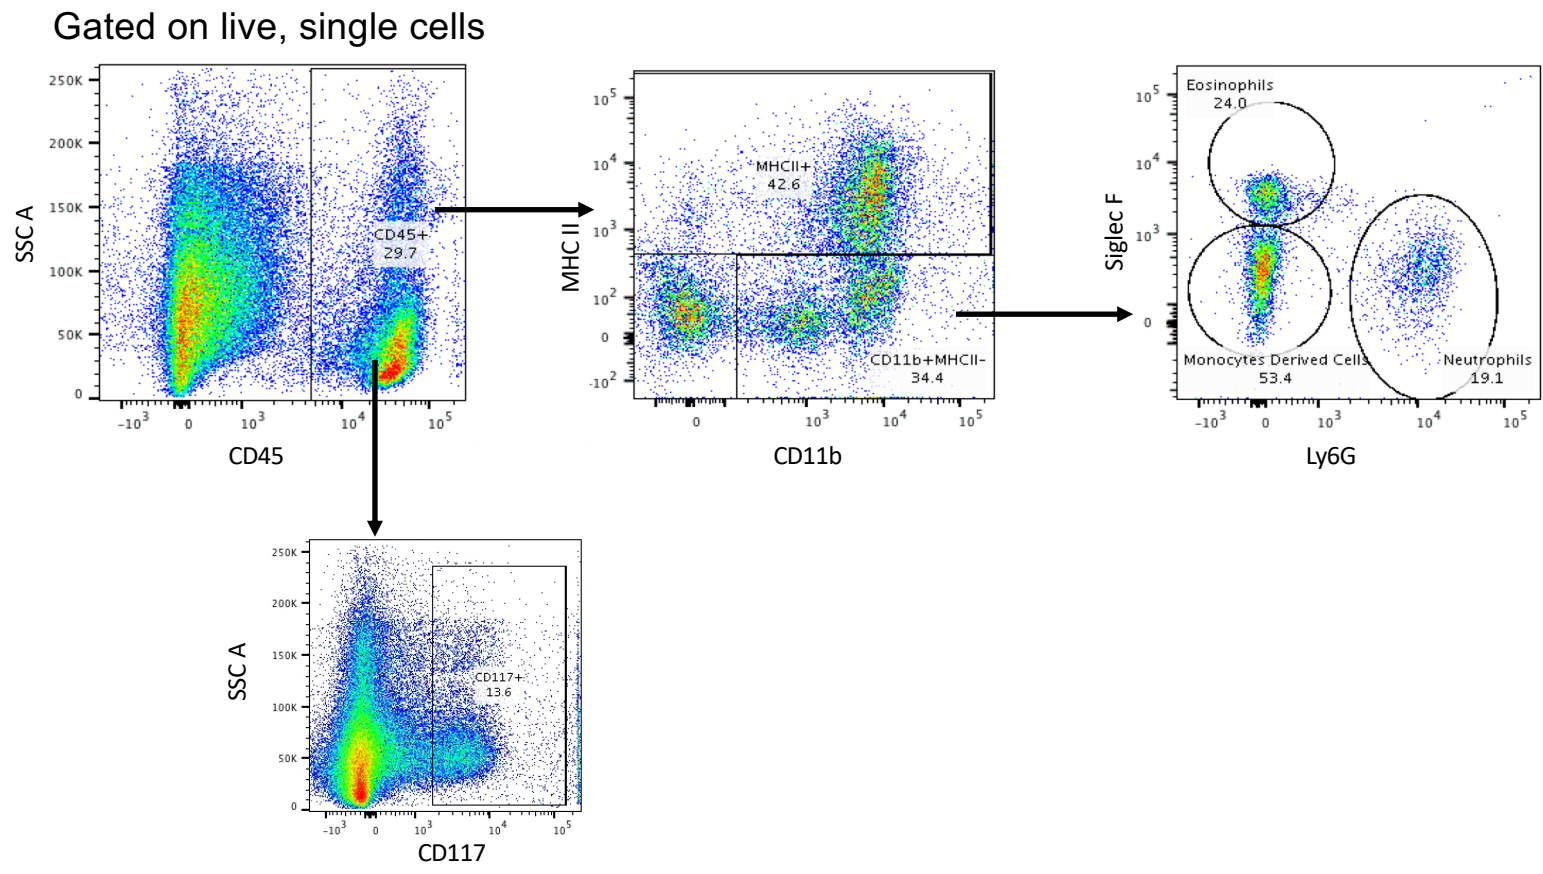

Fig. S2. MRSA 1369 organ burden in the WT and *Nlrp3*<sup>-/-</sup> mouse model of ascending UTI (without a catheter insert) at 6 and 72 hpi

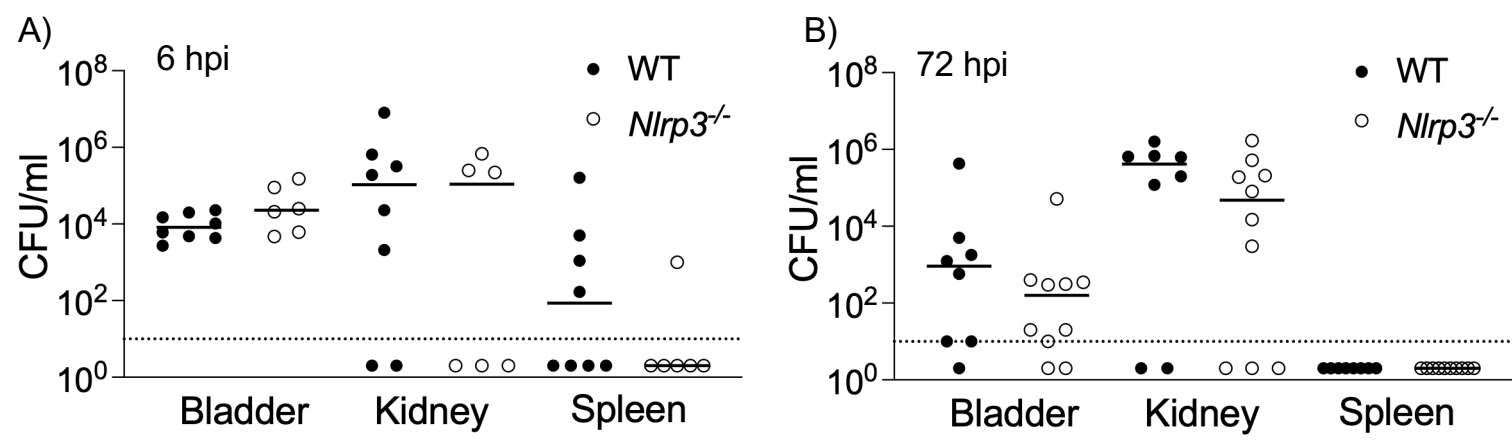

Fig. S3. MCC950 does not affect the *in vitro* growth of MRSA 1369 in brain heart infusion (BHI) broth

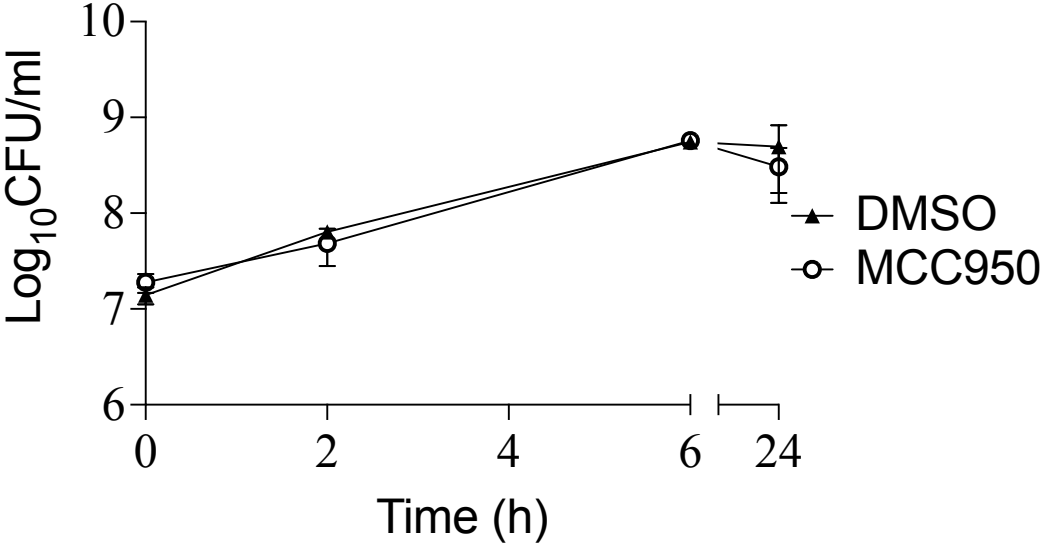

Fig. S4. MRSA 1369 organ burden in the WT and *Nlrp3*<sup>-/-</sup> mouse model of CAUTI at 72 hpi and 7 days pi

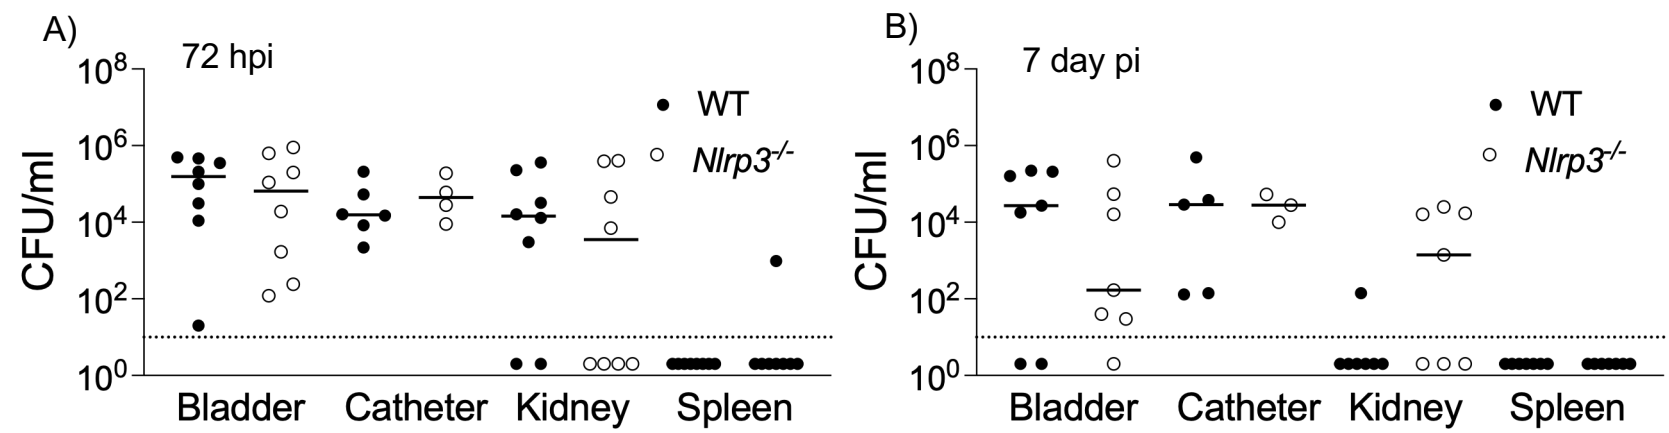

Supplement: s1 [file s1]
